# Supplementary material for: MiR-182-5p Is Upregulated in Hepatic Tissues from a Diet-Induced NAFLD/NASH/HCC C57BL/6J Mouse Model and Modulates Cyld and Foxo1 Expression
Source: MDPI journal article supplement (doi:10.3390/ijms24119239), 2023-05-25

**Supplementary Figure S1. Analysis of Cyld and Foxo1 mRNA expression levels.** Peritumor normal and tumor HF/LF-HC hepatic tissues were retrotranscribed by using the High-Capacity cDNA reverse transcription kit (Thermo Fisher) according to the manufacturer's instructions. One microliter of product was used for semi-quantitative multiplex RT-PCR (Promega) following the manufacturer's protocol (40 sec at 94°C, 30 sec at 60°, 40 sec at 72°C, 35 cycles). Primers' sequences as follows: FOXO1 - sense CCCAGTGTGAATCATGGGCA,  $\alpha$ -sense AGACTCAGTTTGTCCAAGCAGAAC; CYLD - sense GCTAATGATTGCCTTGAGAAAGACA,  $\alpha$ -sense TGTCTCATACTTAGGAGCCCCT; HPRT - sense TTGGATACAGGCCAGACTTTG and  $\alpha$ -sense TGGCAACATCAACAGGACTC. HPRT (hypoxanthine-guanine phosphoribosyl transferase) was used as endogenous control.

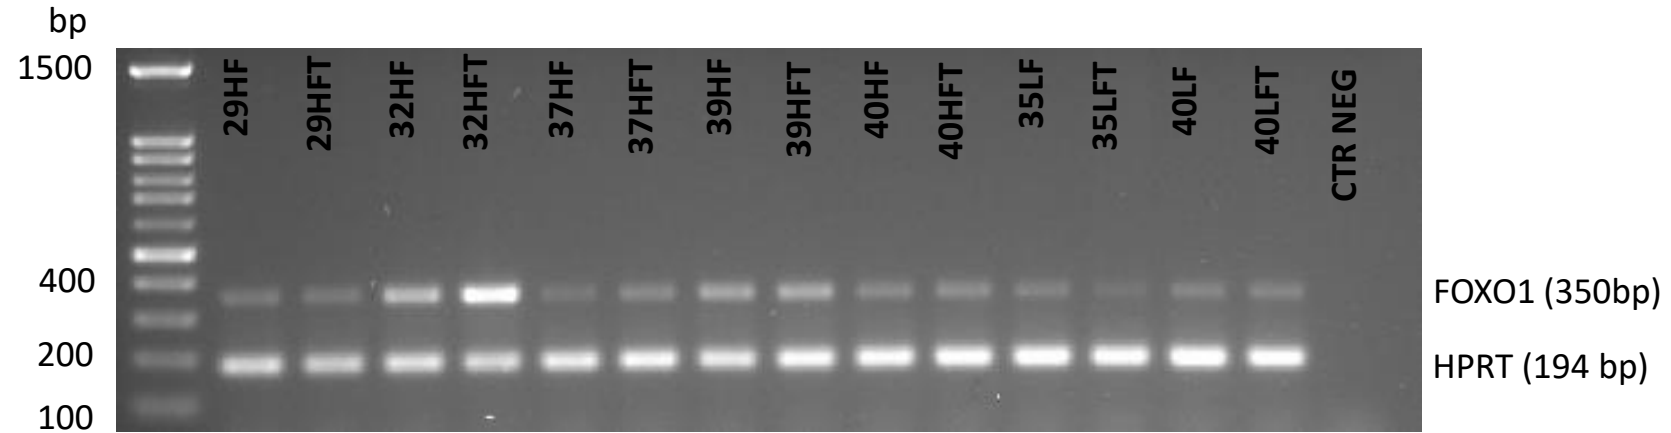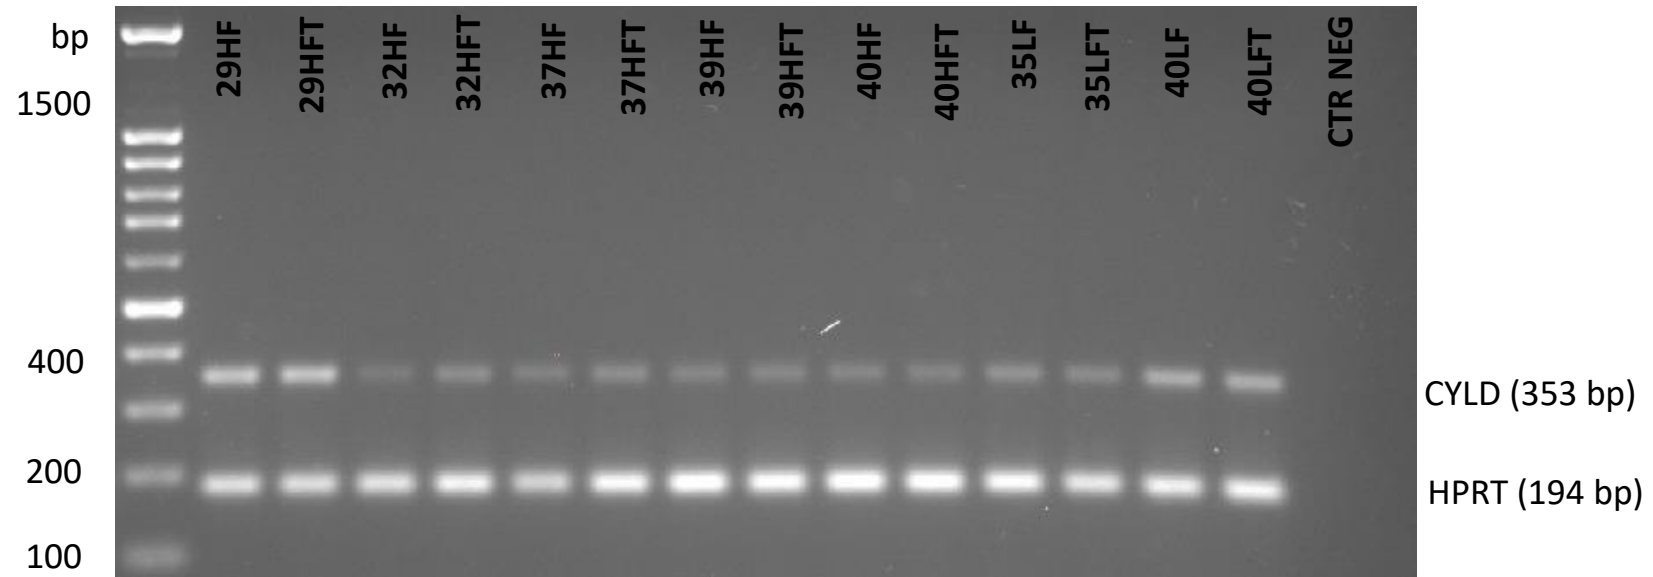

Supplement: s1 [file s1]
