# Supplementary material for: MiR-182-5p Is Upregulated in Hepatic Tissues from a Diet-Induced NAFLD/NASH/HCC C57BL/6J Mouse Model and Modulates Cyld and Foxo1 Expression
Source: MDPI journal article supplement (doi:10.3390/ijms24119239), 2023-05-25

**Supplementary Figure S2.** Representative images of Cyld and FoxO1 immunohistochemistry (primary antibodies: cylindromatosis 1 (E-10), sc-74435 and FKHR (C9), sc-374427 - Santa Cruz Biotechnology) in HF and LF-HC liver normal and tumor tissues. The ABC staining system, Avidin/Biotin Complex (VECTASTAIN Elite ABC System PK-6100) with DAB substrate (3-3'diaminobenzidine; Ultravision detection System DAB Substrate System, Lab Vision Corporation, TA-125 -HD) were used. Nuclei were counterstained with hematoxylin.

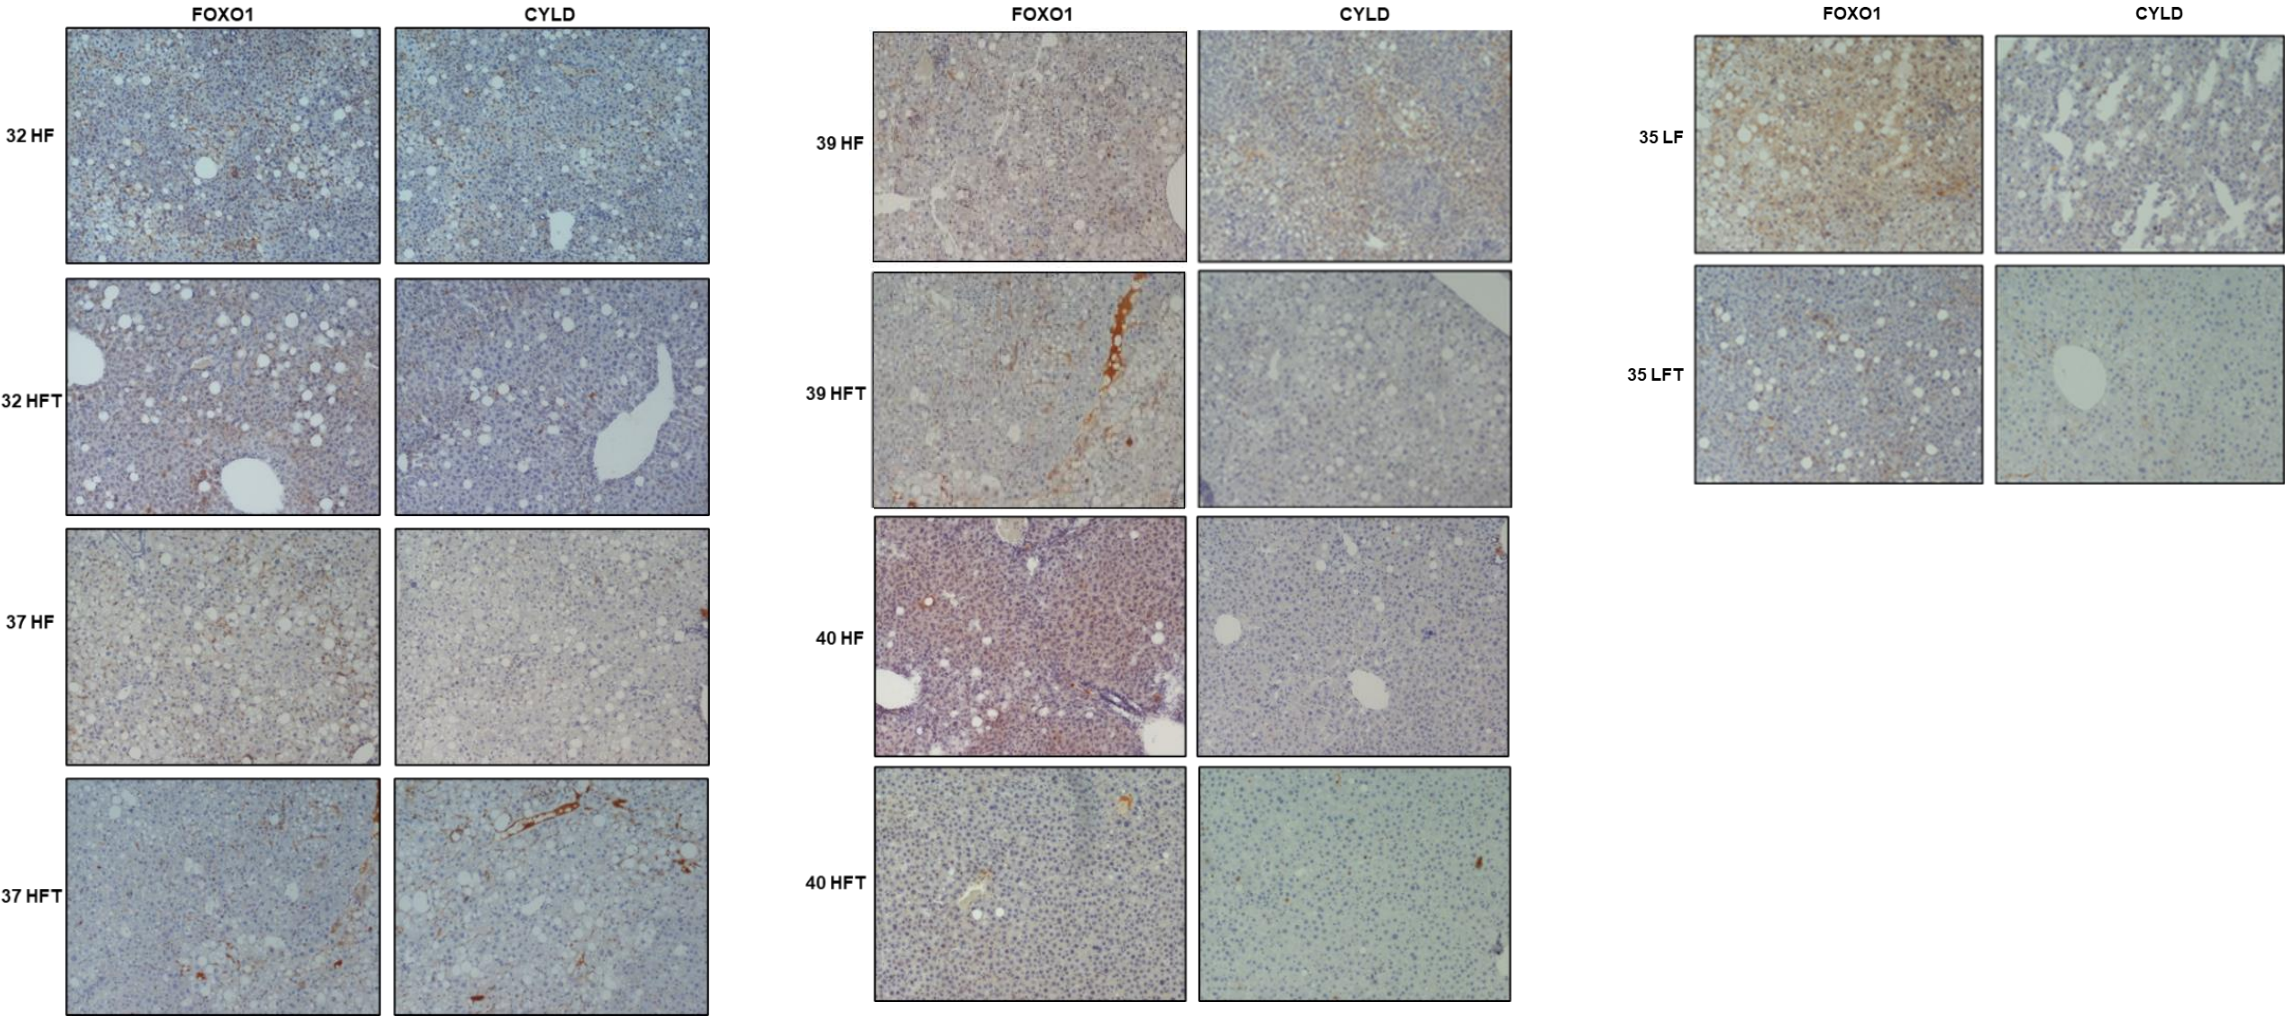

Supplement: s1 [file s1]
