# Supplementary material for: MiR-182-5p Is Upregulated in Hepatic Tissues from a Diet-Induced NAFLD/NASH/HCC C57BL/6J Mouse Model and Modulates Cyld and Foxo1 Expression
Source: Int J Mol Sci. 2023 May 25;24(11):9239. doi: 10.3390/ijms24119239 (PMC10252350; doi:10.3390/ijms24119239)
Supplement: Supplementary file 1 [file ijms-24-09239-s001.zip › Table S1.xlsx]

## Sheet: Foglio1
Supplementary Table 1. Studies from Database of Differentially Expressed miRNAs in Human Cancers (dbDEMC) reporting a statistically significant difference in miR-182-5p expression in HCC samples compared to normal samples
Source ID	Comparison	logFC	miR-182 Expression Status	Experiment ID	p-value	adj p-value	Study Design	Technology	Reference
GSE22058	cancer vs normal	0.18	up-regulated	EXP00100	2.59e-05	5.64e-05	96 pairs of tumor/non-tumor tissues	qPCR array	Burchard J, Zhang C, Liu AM, Poon RT, Lee NP, Wong KF, Sham PC, Lam BY, Ferguson MD, Tokiwa G, Smith R, Leeson B, Beard R, Lamb JR, Lim L, Mao M, Dai H, Luk JM. microRNA-122 as a regulator of mitochondrial metabolic gene network in hepatocellular carcinoma. Mol Syst Biol. 2010 Aug 24;6:402
GSE6857	cancer vs normal	0.54	up-regulated	EXP00081	1.2e-22	5.08e-22	primary HCC and corresponding noncancerous hepatic tissues from 244 HCC patients	Microarray	Budhu A, Jia HL, Forgues M, Liu CG, Goldstein D, Lam A, Zanetti KA, Ye QH, Qin LX, Croce CM, Tang ZY, Wang XW. Identification of metastasis-related microRNAs in hepatocellular carcinoma. Hepatology. 2008 Mar;47(3):897-907.
GSE74618	cancer vs normal	2.85	up-regulated	EXP00453	1.91e-4	8.81e-3	218 HCC, 10 Cirrhotic and 10 Normal patients	Microarray	Martinez-Quetglas I, Pinyol R, Dauch D, Torrecilla S, Tovar V, Moeini A, Alsinet C, Portela A, Rodriguez-Carunchio L, Solé M, Lujambio A, Villanueva A, Thung S, Esteller M, Zender L, Llovet JM. IGF2 Is Up-regulated by Epigenetic Mechanisms in Hepatocellular Carcinomas and Is an Actionable Oncogene Product in Experimental Models. Gastroenterology. 2016 Dec;151(6):1192-1205.
GSE36915	cancer vs normal	1.44	up-regulated	EXP00221	1.60e-6	2.34e-5	68 HCC and 21 non-tumor liver tissues	Array-based microRNA profiling	Shih TC, Tien YJ, Wen CJ, Yeh TS, Yu MC, Huang CH, Lee YS, Yen TC, Hsieh SY. MicroRNA-214 downregulation contributes to tumor angiogenesis by inducing secretion of the hepatoma-derived growth factor in human hepatoma. J Hepatol. 2012 Sep;57(3):584-91.
GSE39678	cancer vs normal	1.64	up-regulated	EXP00183	2.17e-3	1.66e-2	16 HCC tissues and 8 normal liver tissues	Microarray	Noh JH, Chang YG, Kim MG, Jung KH, Kim JK, Bae HJ, Eun JW, Shen Q, Kim SJ, Kwon SH, Park WS, Lee JY, Nam SW. MiR-145 functions as a tumor suppressor by directly targeting histone deacetylase 2 in liver cancer. Cancer Lett. 2013 Jul 28;335(2):455-62.
TCGA_LIHC	cancer vs normal	2.26	up-regulated	EXP00409	1.32e-10	2.03e-09	372 HCC and 50 normal tissues	NGS	https://portal.gdc.cancer.gov/projects/TCGA-LIHC
GSE147889	cancer vs normal	1.07	up-regulated	EXP00576	8.90e-6	1.05e-4	97 samples of HCC tumor tissue with corresponding samples of surrounding tissue	Microarray	Umezu T, Tsuneyama K, Kanekura K, Hayakawa M, Tanahashi T, Kawano M, Taguchi YH, Toyoda H, Tamori A, Kuroda M, Murakami Y. Comprehensive analysis of liver and blood miRNA in precancerous conditions. Sci Rep. 2020 Dec 10;10(1):21766.
SRP049590	cancer vs normal	1.80	up-regulated	EXP00719	8.62e-05	0.00126	24 HCC and adjacent normal tissues	NGS	Wojcicka A, Swierniak M, Kornasiewicz O, Gierlikowski W, Maciag M, Kolanowska M, Kotlarek M, Gornicka B, Koperski L, Niewinski G, Krawczyk M, Jazdzewski K. Next generation sequencing reveals microRNA isoforms in liver cirrhosis and hepatocellular carcinoma. Int J Biochem Cell Biol. 2014 Aug;53:208-17.
